# Supplementary material for: Differences in ambulatory care fragmentation by race
Source: Springer Nature journal article supplement (doi:10.1186/s12913-021-06133-9), 2021-02-17
Supplement: 12913_2021_6133_MOESM1_ESM.pdf [file 12913_2021_6133_MOESM1_ESM.pdf]

Appendix 1. Definitions of variables used to describe characteristics of participants, based on data collected by the Reasons for Geographic and Racial Differences in Stroke study<sup>17</sup>

| Variable                                              | Definition / Source of information*                                                                                                                                                                                   |
|-------------------------------------------------------|-----------------------------------------------------------------------------------------------------------------------------------------------------------------------------------------------------------------------|
| <b>Demographic characteristics</b>                    |                                                                                                                                                                                                                       |
| Age                                                   | Self-report                                                                                                                                                                                                           |
| Sex                                                   | Self-report                                                                                                                                                                                                           |
| Race                                                  | Self-report                                                                                                                                                                                                           |
| Marital status                                        | Self-report                                                                                                                                                                                                           |
| Annual household income                               | Self-report                                                                                                                                                                                                           |
| Educational attainment                                | Self-report                                                                                                                                                                                                           |
| Geographic region                                     | Participant contact information                                                                                                                                                                                       |
| Rural / urban setting                                 | Rural/Urban Commuting Area codes <sup>21</sup>                                                                                                                                                                        |
| <b>Medical conditions</b>                             |                                                                                                                                                                                                                       |
| Hypertension                                          | Systolic blood pressure $\geq 140$ mm Hg or diastolic blood pressure $\geq 90$ mm Hg assessed during the in-home visit, or self-reported use of antihypertensive medication                                           |
| Dyslipidemia                                          | Use of lipid-lowering medication, total cholesterol $\geq 240$ mg/dL, low-density lipoprotein cholesterol $\geq 160$ mg/dL, or high-density lipoprotein cholesterol $\leq 40$ mg/dL assessed during the in-home visit |
| Diabetes                                              | Fasting glucose $\geq 126$ mg/dL or non-fasting glucose $\geq 200$ mg/dL assessed during the in-home visit, or self-reported use of oral glucose-lowering medication or insulin                                       |
| Atrial fibrillation                                   | Self-report of this diagnosis by a physician or nurse, or present on the study electrocardiogram                                                                                                                      |
| Myocardial infarction                                 | Self-report of this diagnosis by a physician or nurse, or based on evidence from the study electrocardiogram at baseline (plus adjudicated myocardial infarctions for a sensitivity analysis)                         |
| Stroke                                                | Self-report of this diagnosis by a physician or nurse (plus adjudicated strokes for a sensitivity analysis)                                                                                                           |
| <b>Medications</b>                                    |                                                                                                                                                                                                                       |
| Total number of medications taken in the past 2 weeks | Assessed by medication inventory                                                                                                                                                                                      |
| Use of anti-hypertensive medication                   | Self-report                                                                                                                                                                                                           |
| Use of insulin                                        | Self-report                                                                                                                                                                                                           |
| Use of statin                                         | Assessed by medication inventory                                                                                                                                                                                      |
| <b>Health behaviors</b>                               |                                                                                                                                                                                                                       |
| Cigarette smoking status                              | Self-report                                                                                                                                                                                                           |
| Alcohol use                                           | Self-report <sup>22</sup>                                                                                                                                                                                             |
| Exercise frequency                                    | Self-report                                                                                                                                                                                                           |

|                                                              |                                                                                                         |
|--------------------------------------------------------------|---------------------------------------------------------------------------------------------------------|
| Psychosocial variables                                       |                                                                                                         |
| Being the primary caretaker for another individual           | Self-report                                                                                             |
| Having seen any close friends or relatives in the past month | Self-report                                                                                             |
| Depressive symptoms                                          | Center for Epidemiologic Studies Depression Scale (CES-D) scores $\geq 4$ <sup>23</sup>                 |
| Physiologic variables                                        |                                                                                                         |
| Body mass index                                              | Assessed from height and weight measured during the in-home visit physical examination                  |
| Systolic blood pressure                                      | Assessed during the in-home visit physical examination                                                  |
| Total cholesterol                                            | Measured via blood test                                                                                 |
| Low-density lipoprotein cholesterol                          | Measured via blood test                                                                                 |
| High-density lipoprotein cholesterol                         | Measured via blood test                                                                                 |
| Serum glucose                                                | Measured via blood test                                                                                 |
| Estimated glomerular filtration rate (eGFR)                  | Measured via blood test <sup>24</sup>                                                                   |
| Albumin-to-creatinine ratio (ACR)                            | Measured via urine test <sup>25</sup>                                                                   |
| High sensitivity c-reactive protein                          | Measured via blood test                                                                                 |
| Self-rated health                                            |                                                                                                         |
| Self-rated general health                                    | Self-rated general health, using the first question (SF-1) from the short-form 12 (SF-12) <sup>26</sup> |

\*See Table 1 for categorical response options for relevant self-reported items. See the Methods section for information on the timing of data collection.

Appendix 2. Formula for the Bice-Boxerman Index (BBI)<sup>\*28</sup>

$$BBI = \frac{(\sum_{i=1}^p n_i^2) - n}{n(n-1)}$$

where  $n$  = total number of visits in the 12-month period

$n_i$  = number of visits to provider  $i$

$p$  = total number of providers

\* The BBI is a continuous index that ranges from 0 to 1. We have reversed the direction of the Index, calculating 1 minus BBI, so that higher scores reflect more fragmentation.

Appendix 3. Hypothetical patients, their ambulatory care patterns, and their fragmentation scores\*

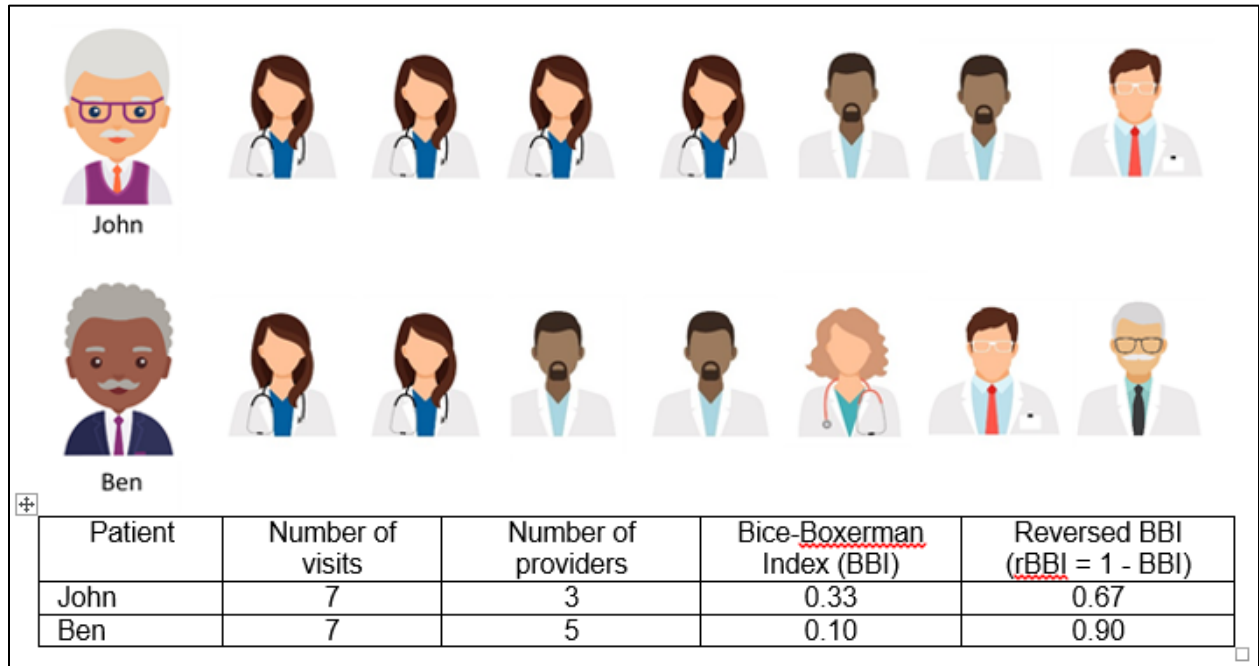

\*Each provider icon represents one visit. If the same provider icon repeats, it represents another visit to the same provider. Both John and Ben have the same number of visits (7 visits), but their patterns of ambulatory care are different. John has one provider with a majority of visits, whereas Ben’s visits are more diffusely spread across many providers, with no single provider having a substantial proportion of visits. Ben’s care is more fragmented, and he has the higher rBBI. Icons by maradaisy and StockSmartStart; images reproduced with permission from Shutterstock.com.<sup>39-41</sup>

## Appendix 4. Derivation of the study sample

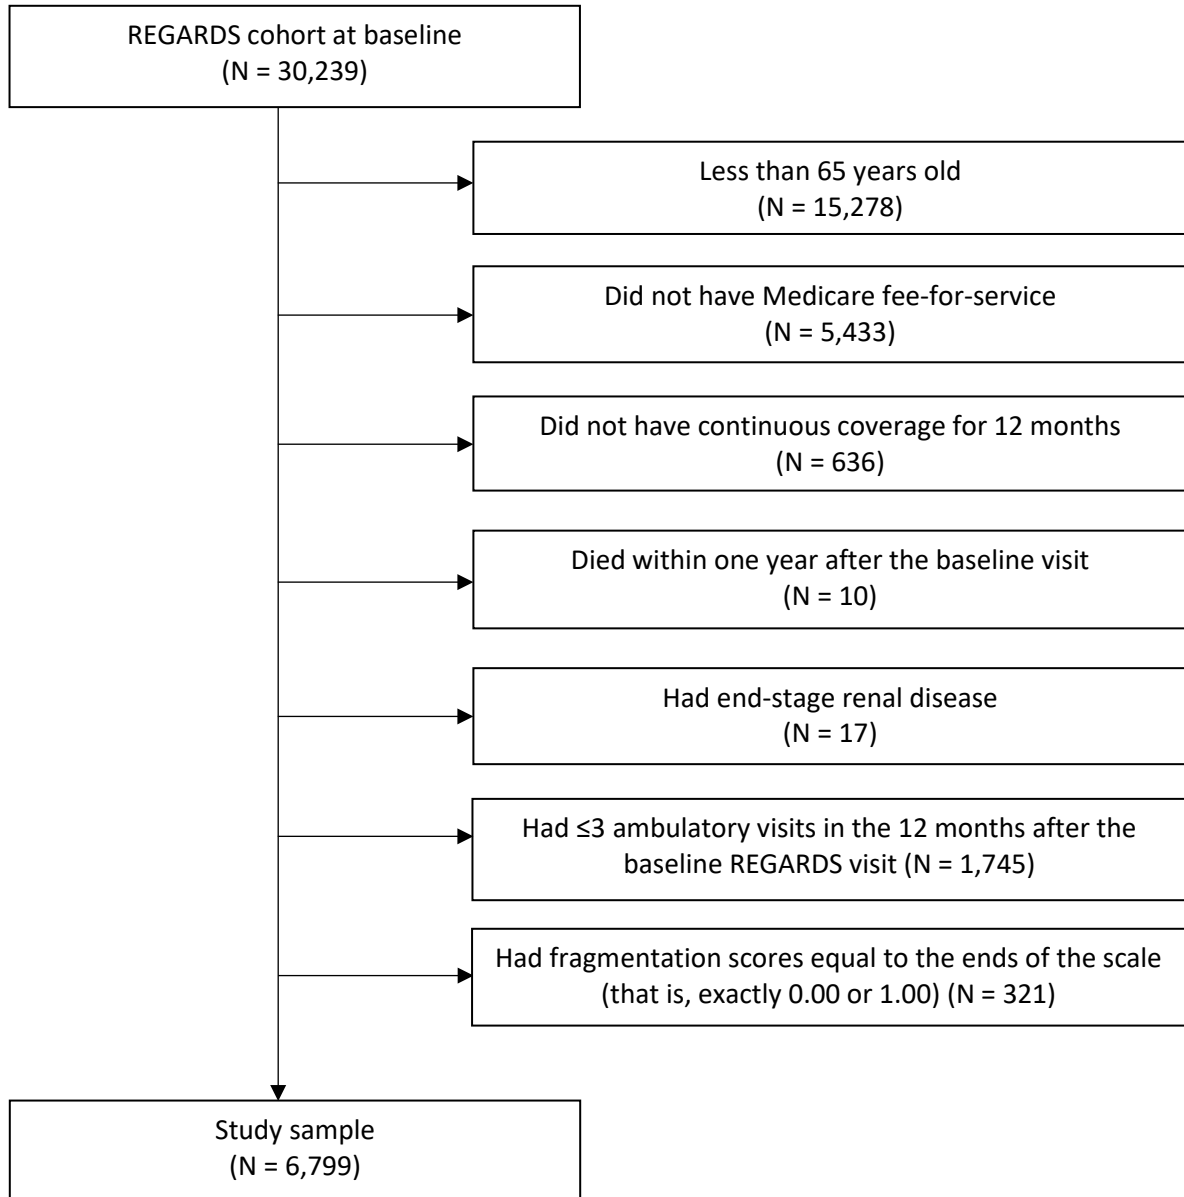

REGARDS = REasons for Geographic and Racial Differences in Stroke.

## Appendix 5. Sensitivity analyses for the associations among race, income, education, and healthcare fragmentation

|                                                                          | Final model for primary analysis† | Sensitivity analysis 1‡       | Sensitivity analysis 2§       |
|--------------------------------------------------------------------------|-----------------------------------|-------------------------------|-------------------------------|
| Race<br>(black vs. white)                                                | -0.027***<br>(-0.040,-0.015)      | -0.033***<br>(-0.049, -0.017) | -0.049***<br>(-0.067, -0.031) |
| Annual household income<br>(<\$35,000 vs. ≥\$35,000)                     | -0.010<br>(-0.021,0.002)          | -0.018*<br>(-0.032, -0.003)   | -0.004<br>(-0.022, 0.013)     |
| Educational attainment<br>(high school or less vs. some college or more) | -0.002<br>(-0.013,0.009)          | 0.000<br>(-0.014, 0.014)      | -0.030***<br>(-0.047, -0.013) |

†Multivariable linear regression was used to determine associations among race, income, and educational attainment (as independent variables) and healthcare fragmentation (as a dependent variable, using the continuous reversed Bice-Boxerman Index). Negative coefficients indicate lower fragmentation scores than the reference group. Please see the Methods and Table 4 for more details.

‡Sensitivity analysis 1 is the same as the final model for the primary analysis, except that it re-included those with fragmentation scores equal to 0.00 or equal to 1.00 (N = 7,120).

§Sensitivity analysis 2 is the same as the final model for the primary analysis, except that the time period that the variables were drawn from differs. Sensitivity analysis 2 used co-variates from the second in-home visit and fragmentation scores from the 12 months following the second in-home visit (N = 2,166), instead of co-variates from the first in-home visit and fragmentation scores from the 12 months following the first in-home visit.

\*p < 0.05. \*\*p ≤ 0.01. \*\*\*p ≤ 0.001.

## REFERENCES

- 1-38. See reference list in main manuscript.
39. StockStartSmart [artist]. Medical staff icons: Doctors and nurses medical staff avatars. 2018. (Accessibility confirmed February 15, 2021, at <https://www.shutterstock.com/image-vector/medical-staff-icons-doctors-nurses-staffs-418733212>.)
40. StockStartSmart [artist] Professional doctor avatars isolated on white background: Medicine professionals and medical staff people icons. 2018. (Accessibility confirmed February 15, 2021, at <https://www.shutterstock.com/image-vector/professional-doctor-avatars-isolated-on-white-613984136>.)
41. Maradaisy [artist]. Icons of elderly seniors. 2020. (Accessibility confirmed February 15, 2021, at <https://www.shutterstock.com/image-vector/old-people-avatar-vector-person-flat-1663636021>.)
